# Supplementary material for: A lipidomics platform to analyze the fatty acid compositions of non-polar and polar lipid molecular species from plant tissues: Examples from developing seeds and seedlings of pennycress (Thlaspi arvense)
Source: Front Plant Sci. 2022 Nov 9;13:1038161. doi: 10.3389/fpls.2022.1038161 (PMC9682148; doi:10.3389/fpls.2022.1038161)
Supplement: Supplementary file 4 [file Table_1.xlsx]

## Sheet: Supp Table 1 - IS for quant
Supplementary Table 1. Internal standards used for quantification of the different lipid classes.
Lipid Class	IS used for quantification
PC	PC-35:1[D5] (17:0_18:1)
LPC	LPC-17:0[D5]
PE	PE-35:1[D5] (17:0_18:1)
LPE	LPE-17:0[D5]
PG	PG-35:1[D5] (17:0_18:1)
LPG	LPG-17:0[D5]
PI	PI-35:1[D5] (17:0_18:1)
LPI	LPI-17:0[D5]
PS	PS-35:1[D5] (17:0_18:1)
LPS	LPS-17:0[D5]
DGDG	DGDG-36:0 (18:0_18:0)
MGDG	MGDG-34:0 (16:0_18:0)
SQDG	MGDG-34:0 (16:0_18:0)
MG	MG-19:2
DG	DG-35:1[D5]-FA17:0_18:1
TG	TG-51:2[D5]-FA16:0 (16:0/19:2/16:0)

## Sheet: Supp Table 2 - Non polar lipids
Supplementary Table 2. Non-polar lipid-dependent MS parameters for MRM scan survey.
* DP: Declustering Potential, ¶ EP: Entrance Potential, # CE: Collision Energy, § CXP: Collision cell Exit Potential, are depicted for each non-polar lipid.
Internal standards for each class of non-polar lipids are highlighted in bold. TG with FA compositions are the MRM transitions used for quantification as determined after reviewing TG-FA XIC overlap.
Lipid	Precursor ion (m/z)	Product ion (m/z)	Dwell time (ms)	DP* (V)	EP¶ (V)	CE# (V)	CXP§ (V)
MG-16:1 (16:1/0:0/0:0)	346.3	237.3	1.5	60	10	19	12
MG-C16:0 (16:0/0:0/0:0)	348.3	239.3	1.5	60	10	19	12
MG-C17:0 (17:0/0:0/0:0)	362.3	253.3	1.5	60	10	21	14
MG-C18:3 (18:3/0:0/0:0)	370.3	261.2	1.5	60	10	17	14
MG-C18:2 (18:2/0:0/0:0)	372.3	263.3	1.5	60	10	15	14
MG-C18:1 (16:1/0:0/0:0)	374.3	265.3	1.5	60	10	19	14
MG-C18:0 (18:0/0:0/0:0)	376.3	276.3	1.5	60	10	21	14
MG-C20:2 (20:2/0:0/0:0)	400.3	291.3	1.5	60	10	17	16
MG-C20.:1 (20:1/0:0/0:0)	402.3	293.3	1.5	60	10	21	16
MG-C20:0 (20:0/0:0/0:0)	404.3	295.3	1.5	60	10	21	16
MG-C22:1 (22:1/0:0/0:0)	430.3	321.3	1.5	60	10	21	18
MG-C22:0 (22:0/0:0/0:0)	432.3	323.3	1.5	60	10	21	16
MG-C24:1 (24:1/0:0/0:0)	458.3	349.3	1.5	60	10	21	18
DG-C16:1 (16:1/0:0/0:0)	582.4	311.1	1.5	50	10	31	16
DG-32:1 (16:0/16:1/0:0)	584.53	311.26	1.5	60	10	26	15
DG-32:0 (16:0/16:0/0:0)	586.4	313.3	1.5	50	10	29	16
DG-34:4 (16:1/18:3/0:0)	606.51	311.26	1.5	50	10	29	16
DG-34:3 (16:0/18:3/0:0)	608.53	313.27	1.5	50	10	29	16
DG-34:3 (16:1/18:2/0:0)	608.53	311.26	1.5	50	10	29	16
DG-34:2 (16:0/18:2/0:0)	610.54	313.27	1.5	50	10	29	16
DG-34:2 (16:1/18:1/0:0)	610.54	311.26	1.5	50	10	29	16
DG-34:2 (16:2/18:0/0:0)	610.54	309.24	1.5	50	10	29	16
DG-34:1 (C16:0-18:1/0:0)	612.4	313.3	1.5	50	10	21	16
DG-34:1 (16:0-18:1/0:0)	612.4	339.3	1.5	50	10	23	18
DG-34:0 (16:0-18:0/0:0)	614.4	313.3	1.5	50	10	43	32
DG-34:0 (16:0-18:0/0:0)	614.4	341.3	1.5	50	10	21	18
DG-36:3 (18:3/18:3/0:0)	630.3	335.5	1.5	50	10	29	18
DG-36:5 (18:2/18:3/0:0)	632.53	335.26	1.5	50	10	25	18
DG-36:4 (18:2/18:2/0:0)	634.4	337.3	1.5	50	10	29	18
DG-36:4 (18:1/18:3/0:0)	634.54	335.26	1.5	50	10	29	18
DG-36:3 (16:1/20:2/0:0)	636.56	365.31	1.5	60	10	26	15
DG-36:3 (18:1/18:2/0:0)	636.56	339.29	1.5	60	10	26	15
DG-36:2 (18:1/18:1/0:0)	638.4	339.2	1.5	50	10	31	18
DG-36:2 (18:0/18:2/0:0)	638.4	341.3	1.5	50	10	23	16
DG-36:2 (18:0/18:2/0:0)	638.4	337.3	1.5	50	10	25	16
DG-36:2 (16:1/20:1/0:0)	638.57	311.26	1.5	50	10	25	16
DG-36:1 (18:0/18:1/0:0)	640.59	339.29	1.5	50	10	35	18
DG-36:1 (16:0/20:1/0:0)	640.59	313.27	1.5	50	10	35	18
DG-36:1 (16:1/20:0/0:0)	640.59	311.26	1.5	50	10	35	18
DG-36:0 (18:0/18:0/0:0)	642.4	341.4	1.5	50	10	35	18
DG-36:0 (16:0/20:0/0:0)	642.6	313.27	1.5	50	10	35	18
DG-38:5 (18:3/20:2/0:0)	660.56	365.31	1.5	50	10	35	18
DG-38:4 (18:3/20:1/0:0)	662.57	367.32	1.5	50	10	35	18
DG-38:4 (18:2/20:2/0:0)	662.57	365.31	1.5	50	10	35	18
DG-38:3 (18:3/20:0/0:0)	664.59	369.34	1.5	50	10	35	18
DG-38:3 (18:2/20:1/0:0)	664.59	367.32	1.5	50	10	35	18
DG-38:3 (18:1/20:2/0:0)	664.59	365.31	1.5	50	10	35	18
DG-38:2 (16:1/22:1/0:0)	666.6	395.35	1.5	50	10	35	18
DG-38:2 (18:2/20:0/0:0)	666.6	369.34	1.5	50	10	35	18
DG-38:2 (18:1/20:1/0:0)	666.6	367.32	1.5	50	10	35	18
DG-38:2 (18:0/20:2/0:0)	666.6	365.31	1.5	50	10	35	18
DG-38:1 (16:1/22:0/0:0)	668.62	397.37	1.5	50	10	35	18
DG-38:1 (16:0/22:1/0:0)	668.62	395.35	1.5	50	10	35	18
DG-38:1 (18:1/20:0/0:0)	668.62	369.34	1.5	50	10	35	18
DG-38:1 (18:0/20:1/0:0)	668.62	367.32	1.5	50	10	35	18
DG-38:0 (16:0/22:0/0:0)	670.63	397.37	1.5	50	10	35	18
DG-38:0 (18:0/20:0/0:0)	670.63	369.34	1.5	50	10	35	18
DG-40:4 (20:2/20:2/0:0)	690.3	365.3	1.5	50	10	33	20
DG-40:4 (18:3/22:1/0:0)	690.6	395.35	1.5	50	10	33	20
DG-40:3 (18:3/22:0/0:0)	692.62	397.37	1.5	50	10	33	20
DG-40:3 (18:2/22:1/0:0)	692.62	395.35	1.5	50	10	33	20
DG-40:3 (20:1/20:2/0:0)	692.62	367.32	1.5	50	10	33	20
DG-40:2 (20:1/20:1/0:0)	694.4	367.3	1.5	50	10	31	20
DG-40:2 (16:1/24:1/0:0)	694.63	423.38	1.5	50	10	31	20
DG-40:2 (18:2/22:0/0:0)	694.63	397.37	1.5	50	10	31	20
DG-40:2 (18:1/22:1/0:0)	694.63	395.35	1.5	50	10	31	20
DG-40:2 (20:0/20:2/0:0)	694.63	369.34	1.5	50	10	31	20
DG-40:1 (16:1/24:0/0:0)	696.65	425.4	1.5	50	10	31	20
DG-40:1 (16:0/24:1/0:0)	696.65	423.38	1.5	50	10	31	20
DG-40:1 (18:1/22:0/0:0)	696.65	397.37	1.5	50	10	31	20
DG-40:1 (18:0/22:1/0:0)	696.65	395.35	1.5	50	10	31	20
DG-40:1 (20:0/20:1/0:0)	696.65	369.34	1.5	50	10	31	20
DG-40:0 (20:0/20:0/0:0)	698.4	369.3	1.5	50	10	37	20
DG-40:0 (16:0/24:0/0:0)	698.67	425.4	1.5	50	10	37	20
DG-40:0 (18:0/22:0/0:0)	698.67	397.37	1.5	50	10	37	20
DG-44:3 (20:2/24:1/0:0)	748.68	423.38	1.5	60	10	26	15
DG-44:2 (20:2/24:0/0:0)	750.7	425.4	1.5	60	10	26	15
DG-44:2 (20:1/24:1/0:0)	750.7	423.38	1.5	60	10	26	15
DG-44:2 (20:0/24:2/0:0)	750.7	421.37	1.5	60	10	26	15
DG-44:2 (22:1/22:1/0:0)	750.7	395.35	1.5	60	10	26	15
DG-44:2 (22:1/22:1/0:0)	750.7	395.4	1.5	50	10	33	20
DG-44:1 (20:1/24:0/0:0)	752.71	425.4	1.5	50	10	33	20
DG-44:1 (20:0/24:1/0:0)	752.71	423.38	1.5	50	10	33	20
DG-44:1 (22:0/22:1/0:0)	752.71	397.37	1.5	50	10	33	20
DG-44:0 (22:0/22:0/0:0)	754.4	397.3	1.5	50	10	39	20
DG-44:0 (20:0/24:0/0:0)	754.73	425.4	1.5	50	10	39	20
DG-46:2 (22:1/24:1/0:0)	778.73	423.38	1.5	60	10	26	15
DG-46:1 (22:1/24:0/0:0)	780.74	425.4	1.5	60	10	26	15
DG-46:1 (22:0/24:1/0:0)	780.74	423.38	1.5	60	10	26	15
DG-46:0 (22:0/24:0/0:0)	782.76	425.4	1.5	60	10	26	15
DG-48:2 (24:1/24:1/0:0)	806.7	423.4	1.5	50	10	33	20
DG-48:1 (24:0/24:1/0:0)	808.78	425.4	1.5	50	10	31	24
DG-48:0 (24:0/24:0/0:0)	810.79	425.4	1.5	50	10	31	24
TG-48:3-FA16:1	818.7	547.4	1.5	110	10	33	24
TG-48:0-FA16:0	824.7	551.5	1.5	110	10	33	26
TG-50:3-FA16:1	846.76	575.5	1.5	110	10	33	26
TG-50:3-FA16:0	846.76	573.49	1.5	110	10	33	26
TG-50:3-FA18:3 (18:3_16:0_16:0)	846.76	551.5	1.5	110	10	33	26
TG-50:3-FA18:2	846.76	549.49	1.5	110	10	33	26
TG-50:3-FA16:1	846.76	547.47	1.5	110	10	33	26
TG-50:2-FA16:0	848.77	575.5	1.5	110	10	33	26
TG-50:2-FA18:2 (18:2_16:0_16:0)	848.77	551.5	1.5	110	10	33	26
TG-50:2-FA18:1	848.77	549.49	1.5	110	10	33	26
TG-50:1-FA16:0	850.79	577.52	1.5	110	10	33	26
TG-50:1-FA18:1 (18:1_16:0_16:0)	850.79	551.5	1.5	110	10	33	26
TG-52:6-FA16:1	868.74	597.49	1.5	110	10	33	26
TG-52:6-FA16:0 (16:0_18:3_18:3)	868.74	595.47	1.5	110	10	33	26
TG-52:6-FA16:0	868.74	573.49	1.5	110	10	33	26
TG-52:6-FA16:1	868.74	571.47	1.5	110	10	33	26
TG-52:6-FA18:1	868.74	569.46	1.5	110	10	33	26
TG-52:5-FA16:1	870.76	599.5	1.5	110	10	33	26
TG-52:5-FA16:0 (16:0_18:2_18:3)	870.76	597.49	1.5	110	10	33	26
TG-52:5-FA18:3	870.76	575.5	1.5	110	10	33	26
TG-52:5-FA18:2	870.76	573.49	1.5	110	10	33	26
TG-52:5-FA18:1	870.76	571.47	1.5	110	10	33	26
TG-52:4-FA16:1	872.77	601.52	1.5	110	10	33	26
TG-52:4-FA16:0	872.77	599.5	1.5	110	10	33	26
TG-52:4-FA18:3	872.77	577.52	1.5	110	10	33	26
TG-52:4-FA18:2 (18:2_18:2_16:0)	872.77	575.5	1.5	110	10	33	26
TG-52:4-FA18:1 (18:1_18:3_16:0)	872.77	573.49	1.5	110	10	33	26
TG-52:3-FA16:1	874.79	603.54	1.5	110	10	33	26
TG-52:3-FA16:0 (16:0_18:1_18:2)	874.79	601.52	1.5	110	10	33	26
TG-52:3-FA18:3	874.79	579.54	1.5	110	10	33	26
TG-52:3-FA18:2	874.79	577.52	1.5	110	10	33	26
TG-52:3-FA18:1	874.79	575.5	1.5	110	10	33	26
TG-52:3-FA18:0	874.79	573.49	1.5	110	10	33	26
TG-52:2-FA16:0 (16:0_18:1_18:1)	876.8	603.54	1.5	110	10	33	26
TG-52:2-FA18:2	876.8	579.54	1.5	110	10	33	26
TG-52:2-FA18:1	876.8	577.52	1.5	110	10	33	26
TG-52:2-FA18:0 (18:0_16:0_18:2)	876.8	575.5	1.5	110	10	33	26
TG-54:9-FA18:3	890.8	595.6	1.5	110	10	37	28
TG-54:8-FA18:3	892.74	597.49	1.5	110	10	39	26
TG-54:8-FA18:2 (18:2_18:3_18:3)	892.74	595.47	1.5	110	10	39	26
TG-54:7-FA18:3	894.76	599.5	1.5	110	10	39	26
TG-54:7-FA18:2 (18:2_18:2_18:3)	894.76	597.49	1.5	110	10	39	26
TG-54:7-FA18:1 (18:1_18:3_18:3)	894.76	595.47	1.5	110	10	39	26
TG-54:6-FA18:3	896.77	601.52	1.5	110	10	39	26
TG-54:6-FA18:1 (18:1_18:2_18:3)	896.77	597.49	1.5	110	10	39	26
TG-54:6-FA18:0 (18:0_18:3_18:3)	896.77	595.47	1.5	110	10	39	26
TG-54:6-FA18:2 (18:2_18:2_18:2)	896.8	599.6	1.5	110	10	39	26
TG-54:5-FA18:3 (18:3_18:1_18:1)	898.79	603.54	1.5	110	10	39	26
TG-54:5-FA18:2 (18:2_18:2_18:1)	898.79	601.52	1.5	110	10	39	26
TG-54:5-FA18:1	898.79	599.5	1.5	110	10	39	26
TG-54:5-FA18:0 (18:0_18:2_18:3)	898.79	597.49	1.5	110	10	39	26
TG-54:4-FA18:3 (18:3_20:1_16:0)	900.8	605.55	1.5	110	10	39	26
TG-54:4-FA18:2 (18:2_18:1_18:1)	900.8	603.54	1.5	110	10	39	26
TG-54:4-FA18:1	900.8	601.52	1.5	110	10	39	26
TG-54:4-FA18:0 (18:0_18:2_18:2)	900.8	599.5	1.5	110	10	39	26
TG-54:3-FA18:1 (18:1_18:1_18:1)	902.7	603.5	1.5	110	10	35	28
TG-54:3-FA18:3	902.82	607.57	1.5	110	10	37	26
TG-54:3-FA18:2	902.82	605.55	1.5	110	10	37	26
TG-54:3-FA18:0 (18:0_18:1_18:2)	902.82	601.52	1.5	110	10	37	26
TG-54:2-FA18:2	904.83	607.57	1.5	110	10	37	26
TG-54:2-FA18:1 (18:1_18:1_18:0)	904.83	605.55	1.5	110	10	37	26
TG-54:2-FA18:0	904.83	603.54	1.5	110	10	37	26
TG-56:5-FA20:1	926.82	599.5	1.5	110	10	37	26
TG-56:5-FA20:0	926.82	597.49	1.5	110	10	37	26
TG-56:5-FA18:3	926.82	631.57	1.5	110	10	37	26
TG-56:5-FA18:2 (18:2_18:2_20:1)	926.82	629.55	1.5	110	10	37	26
TG-56:5-FA18:1 (18:1_18:3_20:1)	926.82	627.54	1.5	110	10	37	26
TG-56:4-FA18:3 (18:3_22:1_16:0)	928.83	633.58	1.5	110	10	37	26
TG-56:4-FA18:2	928.83	631.57	1.5	110	10	37	26
TG-56:4-FA18:1	928.83	629.55	1.5	110	10	37	26
TG-56:4-FA18:0	928.83	627.54	1.5	110	10	37	26
TG-56:4-FA20:1 (20:1_18:2_18:1)	928.83	601.52	1.5	110	10	37	26
TG-56:4-FA20:0	928.83	599.5	1.5	110	10	37	26
TG-56:3-FA18:2	930.85	633.58	1.5	110	10	37	26
TG-56:3-FA18:1	930.85	631.57	1.5	110	10	37	26
TG-56:3-FA18:0	930.85	629.55	1.5	110	10	37	26
TG-56:3-FA20:1 (20:1_18:1_18:1)	930.85	603.54	1.5	110	10	37	26
TG-56:3-FA20:0	930.85	601.52	1.5	110	10	37	26
TG-56:2-FA18:2	932.86	635.6	1.5	110	10	37	26
TG-56:2-FA18:1	932.86	633.58	1.5	110	10	37	26
TG-56:2-FA18:0	932.86	631.57	1.5	110	10	37	26
TG-56:2-FA20:1 (20:1_18:0_18:1)	932.86	605.55	1.5	110	10	37	26
TG-56:2-FA20:0	932.86	603.54	1.5	110	10	37	26
TG-57:0-FA19:0	950.9	635.6	1.5	110	10	46	16
TG-58:4-FA18:3	956.86	661.61	1.5	110	10	37	26
TG-58:4-FA18:2	956.86	659.6	1.5	110	10	37	26
TG-58:4-FA18:1	956.86	657.58	1.5	110	10	37	26
TG-58:4-FA22:1 (22:1_18:2_18:1)	956.86	601.52	1.5	110	10	37	26
TG-58:4-FA22:0	956.86	599.5	1.5	110	10	37	26
TG-58:3-FA18:2 (18:2_22:1_18:0)	958.88	661.61	1.5	110	10	37	26
TG-58:3-FA18:1	958.88	659.6	1.5	110	10	37	26
TG-58:3-FA22:1 (22:1_18:1_18:1)	958.88	603.54	1.5	110	10	37	26
TG-58:2-FA18:1 (18:1_22:1_18:0)	960.9	661.61	1.5	110	10	37	26
TG-60:6-FA20:2	981.1	655.6	1.5	110	10	41	30
TG-60:4-FA18:3	984.9	689.64	1.5	110	10	39	20
TG-60:4-FA18:2	984.9	687.63	1.5	110	10	39	20
TG-60:4-FA18:1 (18:1_18:2_24:1)	984.9	685.61	1.5	110	10	39	20
TG-60:4-FA24:1	984.9	601.52	1.5	110	10	39	20
TG-60:4-FA24:0	984.9	599.5	1.5	110	10	39	20
TG-60:3-FA18:2	986.91	689.64	1.5	110	10	39	20
TG-60:3-FA18:1	986.91	687.63	1.5	110	10	39	20
TG-60:3-FA24:1	986.91	603.54	1.5	110	10	39	20
TG-60:3-FA24:0	986.91	601.52	1.5	110	10	39	20
TG-60:3-FA20:1	987.1	659.6	1.5	110	10	39	20
TG-60:2-FA18:1	988.93	689.64	1.5	110	10	39	20
TG-60:0-FA20:0	992.9	663.6	1.5	110	10	39	28
TG-62:3-FA18:2	1014.94	717.68	1.5	110	10	43	32
TG-62:3-FA18:1 (18:1_22:1_22:1)	1014.94	715.66	1.5	110	10	43	32
TG-66:3-FA22:1	1071.1	715.8	1.5	110	10	43	32
TG-72:3-FA24:1	1155.4	771.8	1.5	110	10	43	32
TG-54:0-FA18:0	908.9	607.6	1.5	110	10	37	28
TG-58:6-FA18:3 (18:3_22:1_18:2)	952.83	657.58	1.5	110	10	39	20
TG-58:6-FA18:2	952.83	655.57	1.5	110	10	39	20
TG-58:6-FA22:1	952.83	597.49	1.5	110	10	39	20
TG-58:5-FA18:3	954.85	659.6	1.5	110	10	39	20
TG-58:5-FA18:2 (18:2_18:2_22:1)	954.85	657.58	1.5	110	10	39	20
TG-58:5-FA18:1 (18:1_18:3_22:1)	954.85	655.57	1.5	110	10	39	20
TG-58:5-FA20:1	954.85	627.54	1.5	110	10	39	20
TG-58:5-FA22:1	954.85	599.5	1.5	110	10	39	20
TG-60:5-FA18:3 (18:3_22:1_20:1)	982.88	687.63	1.5	110	10	39	20
TG-60:5-FA18:2	982.88	685.61	1.5	110	10	39	20
TG-60:5-FA18:1	982.88	683.6	1.5	110	10	39	20
TG-60:5-FA20:1	982.88	655.57	1.5	110	10	39	20
TG-60:5-FA22:1	982.88	627.54	1.5	110	10	39	20
TG-60:5-FA24:1	982.88	599.5	1.5	110	10	39	20
TG-62:5-FA18:3 (18:3_22:1_22:1)	1010.91	715.66	1.5	110	10	39	20
TG-62:5-FA20:1	1010.91	683.6	1.5	110	10	39	20
TG-62:5-FA22:1	1010.91	655.57	1.5	110	10	39	20
TG-62:5-FA24:1	1010.91	627.54	1.5	110	10	39	20
TG-62:4-FA18:2 (18:2_22:1_22:1)	1012.93	715.66	1.5	110	10	39	20
TG-62:4-FA20:1 (20:1_24:1_18:2)	1012.93	685.61	1.5	110	10	39	20
TG-62:4-FA22:1	1012.93	657.58	1.5	110	10	39	20
TG-62:4-FA24:1	1012.93	629.55	1.4	110	10	39	20
TG-64:5-FA18:3	1038.94	743.69	1.5	110	10	39	20
TG-64:5-FA22:1 (22:1_18:3_24:1)	1038.94	683.6	1.5	110	10	39	20
TG-64:5-FA24:1	1038.94	655.57	1.5	110	10	39	20
TG-64:4-FA18:2	1040.96	743.69	1.5	110	10	39	20
TG-64:4-FA22:1 (22:1_18:2_24:1)	1040.96	685.61	1.5	110	10	39	20
TG-64:4-FA24:1	1040.96	657.58	1.5	110	10	39	20
TG-64:3-FA18:1 (18:1_24:1_22:1)	1042.97	743.69	1.5	110	10	39	20
TG-64:3-FA20:1	1042.97	715.66	1.5	110	10	39	20
TG-64:3-FA22:1	1042.97	687.63	1.5	110	10	39	20
TG-64:3-FA24:1	1042.97	659.6	1.5	110	10	39	20
TG-54:4-FA20:1	900.8	573.49	1.5	110	10	39	20
TG-54:3-FA20:1 (20:1_18:2_16:0)	902.82	575.5	1.5	110	10	39	20
TG-56:4-FA22:1	928.83	573.49	1.5	110	10	39	20
TG-56:3-FA22:1 (22:1_18:2_16:0)	930.85	575.5	1.5	110	10	39	20
TG-56:2-FA16:0 (16:0_18:1_22:1)	932.86	659.6	1.5	110	10	39	20
TG-56:2-FA22:1	932.86	577.52	1.5	110	10	39	20
TG-58:4-FA24:1	956.86	573.49	1.5	110	10	39	20
TG-58:3-FA20:1 (20:1_20:1_18:1)	958.88	631.57	1.5	110	10	39	20
TG-58:3-FA24:1	958.88	575.5	1.5	110	10	39	20
TG-60:4-FA22:1 (22:1_18:2_20:1)	984.9	629.55	1.5	110	10	39	20
TG-60:3-FA22:1 (22:1_18:1_20:1)	986.91	631.57	1.5	110	10	39	20
TG-62:3-FA20:1 (20:1_24:1_18:1)	1014.94	687.63	1.5	110	10	39	20
TG-62:3-FA22:1	1014.94	659.6	1.5	110	10	39	20
TG-62:3-FA24:1	1014.94	631.57	1.5	110	10	39	20
MG-17:1 (17:1/0:0/0:0)	360.2	251.2	0.5	55	10	15	14
MG-C19:0 (19:0/0:0/0:0)	390.3	355.3	1.5	60	10	19	18
MG-C19:1 (19:1/0:0/0:0)	388.3	279.1	1.5	60	10	15	14
MG-C19:2 (19:2/0:0/0:0)	386.3	277.1	1.5	60	10	15	14
MG-C21:0 (21:0/0:0/0:0)	418.3	383.3	1.5	30	10	19	20
MG-C21:0 (21:0/0:0/0:0)	726.6	383.3	1.5	50	10	37	20
TG-45:1-d5 (14:0/17:1/14:0)	785.5	540.6	1.5	80	10	33	24
TG-53:3-d5 (18:1/17:1/18:1)	893.8	594.6	1.5	80	10	37	16
TG-57:4-d5 (18:1/21:2/18:1)	947.8	648.6	1.5	80	10	39	18
DG-31:1-d5 (17:0/14:1/0:0)	575.5	332.2	1.5	60	10	21	18
DG-35:1-d5 (17:0/18:1/0:0)	631.6	344.2	1.5	60	10	27	18
DG-39:4-d5 (17:0/22:4/0:0)	681.6	332.2	1.5	60	10	27	18
TG-41:0-d5 (14:0/13:0/14:0)	731.4	486.4	1.5	80	10	33	24
TG-43:1-d5 (14:0/15:1/14:0)	757.4	512.4	1.5	80	10	33	24
TG-47:1-d5 (16:0/15:1/16:0)	813.4	540.4	1.5	80	10	39	18
TG-49:1-d5 (16:0/17:1/16:0)	841.4	568.4	1.5	80	10	33	24
TG-51:2-d5 (16:0/19:2/16:0)	867.4	594.4	1.5	80	10	37	16
TG-55:4-d5 (18:1/19:2/18:1)	919.6	620.6	1.5	80	10	39	18
DG-33:1-d5 (17:0/16:1/0:0)	603.4	316.4	1.5	60	10	21	18
DG-37:3-d5 (17:0/20:3/0:0)	655.4	368.4	1.5	60	10	27	18
DG-48:2 (24:1/24:1/0:0)	806.7	423.3	1.5	80	10	31	24

## Sheet: Supp Table 3 - Polar lipids
Supplementary Table 3. Polar lipid-dependent MS parameters for scheduled MRM scan survey.
* DP: Declustering Potential, ¶ EP: Entrance Potential, # CE: Collision Energy, § CXP: Collision cell Exit Potential, are depicted for each polar lipid.
Internal standards for each class of polar lipids are highlighted in bold.
Lipid	Precursor ion (m/z)	Product ion (m/z)	Retention time (min)	DP* (V)	EP¶ (V)	CE# (V)	CXP§ (V)
DGDG-34:0 (18:0/16:0)	919.64	283.26	4.5	-180	-10	-40	-15
DGDG-34:1 (18:0/16:1)	917.62	283.26	4.5	-180	-10	-40	-15
DGDG-34:1 (18:1/16:0)	917.62	281.25	4.5	-180	-10	-40	-15
DGDG-34:2 (18:0/16:2)	915.6	283.26	4.5	-180	-10	-40	-15
DGDG-34:2 (18:1/16:1)	915.6	281.25	4.5	-180	-10	-40	-15
DGDG-34:2 (18:2/16:0)	915.6	279.23	4.5	-180	-10	-40	-15
DGDG-34:3 (18:0/16:3)	913.59	283.26	4.5	-180	-10	-40	-15
DGDG-34:3 (18:1/16:2)	913.59	281.25	4.5	-180	-10	-40	-15
DGDG-34:3 (18:2/16:1)	913.59	279.23	4.5	-180	-10	-40	-15
DGDG-34:3 (18:3/16:0)	913.59	277.22	4.5	-180	-10	-40	-15
DGDG-34:4 (18:1/16:3)	911.57	281.25	4.5	-180	-10	-40	-15
DGDG-34:4 (18:2/16:2)	911.57	279.23	4.5	-180	-10	-40	-15
DGDG-34:4 (18:3/16:1)	911.57	277.22	4.5	-180	-10	-40	-15
DGDG-34:5 (18:2/16:3)	909.56	279.23	4.5	-180	-10	-40	-15
DGDG-34:5 (18:3/16:2)	909.56	277.22	4.5	-180	-10	-40	-15
DGDG-34:6 (18:3/16:3)	907.54	277.22	4.5	-180	-10	-40	-15
DGDG-36:0 (18:0/18:0)	947.67	283.26	4.5	-180	-10	-40	-15
DGDG-36:1 (18:1/18:0)	945.65	281.25	4.5	-180	-10	-40	-15
DGDG-36:2 (18:1/18:1)	943.64	281.25	4.5	-180	-10	-40	-15
DGDG-36:2 (18:2/18:0)	943.64	279.23	4.5	-180	-10	-40	-15
DGDG-36:3 (18:1/18:2)	941.62	281.25	4.5	-180	-10	-40	-15
DGDG-36:4 (18:1/18:3)	939.6	281.25	4.5	-180	-10	-40	-15
DGDG-36:4 (18:2/18:2)	939.6	279.23	4.5	-180	-10	-40	-15
DGDG-36:5 (18:2/18:3)	937.59	279.23	4.5	-180	-10	-40	-15
DGDG-36:6 (18:3/18:3)	935.57	277.22	4.5	-180	-10	-40	-15
LPC-15:0-d5 (15:0/0:0)	545.4	241.2	5.2	-60	-10	-40	-13
LPC-16:0 (16:0/0:0)	554.4	255.23	5.15	-60	-10	-40	-15
LPC-17:0-d5 (19:0/0:0)	573.4	269.2	5.15	-60	-10	-40	-13
LPC-17:1 (17:1/0:0)	566.4	267.2	5.15	-60	-10	-40	-13
LPC-18:0 (18:0/0:0)	582.4	283.26	5.15	-60	-10	-40	-15
LPC-18:1 (18:1/0:0)	580.4	281.25	5.15	-60	-10	-40	-15
LPC-18:2 (18:2/0:0)	578.4	279.23	5.15	-60	-10	-40	-15
LPC-18:3 (18:3/0:0)	576.3	277.22	5.15	-60	-10	-40	-15
LPC-19:0-d5 (19:0/0:0)	601.4	297.3	5.15	-60	-10	-44	-15
LPC-20:1 (20:1/0:0)	608.4	309.28	5.15	-60	-10	-40	-15
LPC-20:2 (20:2/0:0)	606.4	307.26	5.15	-60	-10	-40	-15
LPC-22:1 (22:1/0:0)	636.4	337.31	5.15	-60	-10	-40	-15
LPC-24:1 (24:1/0:0)	664.44	365.34	5.15	-60	-10	-40	-15
LPE-15:0-d5 (15:0/0:0)	443.4	241.2	7.4	-75	-10	-30	-13
LPE-16:0 (16:0/0:0)	452.28	255.23	7.4	-75	-10	-32	-15
LPE-17:0-d5 (19:0-/0:0)	471.4	269.1	7.4	-75	-10	-30	-13
LPE-18:0 (18:0/0:0)	480.31	283.26	7.4	-75	-10	-32	-15
LPE-18:1 (18:1/0:0)	478.29	281.25	7.4	-75	-10	-32	-15
LPE-18:2 (18:2/0:0)	476.28	279.23	7.4	-75	-10	-32	-15
LPE-18:3 (18:3/0:0)	474.26	277.22	7.4	-75	-10	-32	-15
LPE-19:0-d5 (19:0/0:0)	499.4	297.3	7.4	-75	-10	-34	-17
LPE-20:1 (20:1/0:0)	506.32	309.28	7.4	-75	-10	-32	-15
LPE-20:2 (20:2/0:0)	504.31	307.26	7.4	-75	-10	-32	-15
LPE-22:1 (22:1/0:0)	534.36	337.31	7.4	-75	-10	-32	-15
LPE-24:1 (24:1/0:0)	562.39	365.34	7.4	-75	-10	-32	-15
LPG-15:0-d5 (15:0/0:0)	474.3	241.1	8.7	-100	-10	-34	-13
LPG-16:0 (16:0/0:0)	483.27	255.23	8.7	-100	-10	-38	-15
LPG-17:0-d5 (19:0/0:0)	502.3	269.2	8.7	-100	-10	-34	-13
LPG-17:1 (17:1/0:0)	495.2	267.2	8.7	-100	-10	-34	-13
LPG-18:0 (18:0/0:0)	511.3	283.26	8.7	-100	-10	-38	-15
LPG-18:1 (18:1/0:0)	509.29	281.25	8.7	-100	-10	-38	-15
LPG-18:2 (18:2/0:0)	507.27	279.23	8.7	-100	-10	-38	-15
LPG-18:3 (18:3/0:0)	505.26	277.22	8.7	-100	-10	-38	-15
LPG-19:0-d5 (19:0/0:0)	530.4	297.2	8.7	-100	-10	-40	-17
LPG-20:1 (20:1/0:0)	537.32	309.28	8.7	-100	-10	-38	-15
LPG-20:2 (20:2/0:0)	535.3	307.26	8.7	-100	-10	-38	-15
LPG-22:1 (22:1/0:0)	565.35	337.31	8.7	-100	-10	-38	-15
LPG-24:1 (24:1/0:0)	593.38	365.34	8.7	-100	-10	-38	-15
LPI-15:0-d5 (15:0/0:0)	562.4	241.2	10	-120	-10	-44	-13
LPI-16:0 (16:0/0:0)	571.29	255.23	10	-120	-10	-48	-15
LPI-17:0-d5 (17:0/0:0)	590.2	269.3	10	-120	-10	-44	-13
LPI-18:0 (18:0/0:0)	599.32	283.26	10	-120	-10	-48	-15
LPI-18:1 (18:1/0:0)	597.3	281.25	10	-120	-10	-48	-15
LPI-18:2 (18:2/0:0)	595.29	279.23	10	-120	-10	-48	-15
LPI-18:3 (18:3/0:0)	593.27	277.22	10	-120	-10	-48	-15
LPI-19:0-d5 (19:0/0:0)	618.4	297.2	10	-120	-10	-50	-15
LPI-20:1 (20:1/0:0)	625.34	309.28	10	-120	-10	-48	-15
LPI-20:2 (20:2/0:0)	623.32	307.26	10	-120	-10	-48	-15
LPI-22:1 (22:1/0:0)	653.37	337.31	10	-120	-10	-48	-15
LPI-24:1 (24:1/0:0)	681.4	365.34	10	-120	-10	-48	-15
LPS-15:0-d5 (15:0/0:0)	487.4	158	12.5	-65	-10	-34	-9
LPS-16:0 (16:0/0:0)	496.27	255.23	12.5	-65	-10	-36	-9
LPS-17:0-d5 (17:0/0:0)	515.4	158	12.5	-65	-10	-34	-9
LPS-17:1 (17:1/0:0)	508.4	267.2	12.5	-65	-10	-34	-9
LPS-18:0 (18:0/0:0)	524.3	283.26	12.5	-65	-10	-36	-9
LPS-18:1 (18:1/0:0)	522.28	281.25	12.5	-65	-10	-36	-9
LPS-18:2 (18:2/0:0)	520.27	279.23	12.5	-65	-10	-36	-9
LPS-18:3 (18:3/0:0)	518.25	277.22	12.5	-65	-10	-36	-9
LPS-19:0-d5 (19:0/0:0)	543.3	158	12.5	-65	-10	-38	-9
LPS-20:1 (20:1/0:0)	550.31	309.28	12.5	-65	-10	-36	-9
LPS-20:2 (20:2/0:0)	548.3	307.26	12.5	-65	-10	-36	-9
LPS-22:1 (22:1/0:0)	578.35	337.31	12.5	-65	-10	-36	-9
LPS-24:1 (24:1/0:0)	606.38	365.34	12.5	-65	-10	-36	-9
MGDG-34:0 (16:0/18:0)	757.6	283.2	2.8	-80	-10	-38	-15
MGDG-34:0 (18:0/16:0)	757.58	283.26	2.8	-80	-10	-30	-15
MGDG-34:1 (18:0/16:1)	755.57	283.26	2.8	-80	-10	-30	-15
MGDG-34:1 (18:1/16:0)	755.57	281.25	2.8	-80	-10	-30	-15
MGDG-34:2 (18:0/16:2)	753.55	283.26	2.8	-80	-10	-30	-15
MGDG-34:2 (18:1/16:1)	753.55	281.25	2.8	-80	-10	-30	-15
MGDG-34:2 (18:2/16:0)	753.55	279.23	2.8	-80	-10	-30	-15
MGDG-34:3 (18:0/16:3)	751.54	283.26	2.8	-80	-10	-30	-15
MGDG-34:3 (18:1/16:2)	751.54	281.25	2.8	-80	-10	-30	-15
MGDG-34:3 (18:2/16:1)	751.54	279.23	2.8	-80	-10	-30	-15
MGDG-34:3 (18:3/16:0)	751.54	277.22	2.8	-80	-10	-30	-15
MGDG-34:4 (18:1/16:3)	749.52	281.25	2.8	-80	-10	-30	-15
MGDG-34:4 (18:2/16:2)	749.52	279.23	2.8	-80	-10	-30	-15
MGDG-34:4 (18:3/16:1)	749.52	277.22	2.8	-80	-10	-30	-15
MGDG-34:5 (18:2/16:3)	747.5	279.23	2.8	-80	-10	-30	-15
MGDG-34:5 (18:3/16:2)	747.5	277.22	2.8	-80	-10	-30	-15
MGDG-34:6 (18:3/16:3)	745.49	277.22	2.8	-80	-10	-30	-15
MGDG-36:0 (18:0/18:0)	785.61	283.26	2.8	-80	-10	-30	-15
MGDG-36:1 (18:1/18:0)	783.6	281.25	2.8	-80	-10	-30	-15
MGDG-36:2 (18:1/18:1)	781.58	281.25	2.8	-80	-10	-30	-15
MGDG-36:2 (18:2/18:0)	781.58	279.23	2.8	-80	-10	-30	-15
MGDG-36:3 (18:1/18:2)	779.57	281.25	2.8	-80	-10	-30	-15
MGDG-36:4 (18:1/18:3)	777.55	281.25	2.8	-80	-10	-30	-15
MGDG-36:4 (18:2/18:2)	777.55	279.23	2.8	-80	-10	-30	-15
MGDG-36:5 (18:2/18:3)	775.54	279.23	2.8	-80	-10	-30	-15
MGDG-36:6 (18:3/18:3)	773.52	277.22	2.8	-80	-10	-30	-15
PC-31:1-d5 (14:1/17:0)	781.6	225.2	3.8	-80	-10	-46	-13
PC-33:1-d5 (17:0/16:1)	809.6	253.2	3.8	-80	-10	-52	-15
PC-34:1 (18:1/16:0)	818.59	281.25	3.8	-80	-10	-50	-15
PC-34:2 (18:2/16:0)	816.58	279.23	3.8	-80	-10	-50	-15
PC-34:3 (18:3/16:0)	814.56	277.22	3.8	-80	-10	-50	-15
PC-35:1-d5 (17:0/18:1)	837.6	281.2	3.8	-80	-10	-50	-15
PC-36:1 (18:1/18:0)	846.62	281.25	3.8	-80	-10	-50	-15
PC-36:1 (20:1/16:0)	846.62	309.28	3.8	-80	-10	-50	-15
PC-36:2 (16:0/20:2)	844.61	255.23	3.8	-80	-10	-50	-15
PC-36:2 (18:1/18:1)	844.61	281.25	3.8	-80	-10	-50	-15
PC-36:2 (18:2/18:0)	844.61	279.23	3.8	-80	-10	-50	-15
PC-36:3 (18:2/18:1)	842.59	279.23	3.8	-80	-10	-50	-15
PC-36:3 (18:3/18:0)	842.59	277.22	3.8	-80	-10	-50	-15
PC-36:4 (18:1/18:3)	840.58	281.25	3.8	-80	-10	-50	-15
PC-36:4 (18:2/18:2)	840.58	279.23	3.8	-80	-10	-50	-15
PC-36:5 (18:2/18:3)	838.56	279.23	3.8	-80	-10	-50	-15
PC-36:6 (18:3/18:3)	836.54	277.22	3.8	-80	-10	-50	-15
PC-37:3-d5 (17:0/20:3)	861.6	305.2	3.8	-80	-10	-52	-15
PC-38:1 (20:1/18:0)	874.65	309.28	3.8	-80	-10	-50	-15
PC-38:1 (22:1/16:0)	874.65	337.31	3.8	-80	-10	-50	-15
PC-38:2 (18:0/20:2)	872.64	283.26	3.8	-80	-10	-50	-15
PC-38:2 (18:1/20:1)	872.64	281.25	3.8	-80	-10	-50	-15
PC-38:3 (18:1/20:2)	870.62	281.25	3.8	-80	-10	-50	-15
PC-38:3 (18:2/20:1)	870.62	279.23	3.8	-80	-10	-50	-15
PC-38:4 (18:2/20:2)	868.61	279.23	3.8	-80	-10	-50	-15
PC-38:4 (20:1/18:3)	868.61	309.28	3.8	-80	-10	-50	-15
PC-39:4-d5 (17:0/22:4)	887.6	331.2	3.8	-80	-10	-52	-15
PC-40:1 (22:1/18:0)	902.69	337.31	3.8	-80	-10	-50	-15
PC-40:1 (24:1/16:0)	902.69	365.34	3.8	-80	-10	-50	-15
PC-40:2 (20:1/20:1)	900.67	309.28	3.8	-80	-10	-50	-15
PC-40:2 (22:1/18:1)	900.67	337.31	3.8	-80	-10	-50	-15
PC-40:3 (20:1/20:2)	898.65	309.28	3.8	-80	-10	-50	-15
PC-40:3 (22:1/18:2)	898.65	337.31	3.8	-80	-10	-50	-15
PC-40:4 (20:2/20:2)	896.64	307.26	3.8	-80	-10	-50	-15
PC-40:4 (22:1/18:3)	896.64	337.31	3.8	-80	-10	-50	-15
PE-31:1-d5 (17:0/14:1)	679.4	225.2	6.2	-170	-10	-38	-13
PE-33:1-d5 (17:0/16:1)	707.6	253.2	6.2	-170	-10	-38	-13
PE-34:1 (18:1/16:0)	716.52	281.25	6.15	-170	-10	-45	-15
PE-34:2 (18:2/16:0)	714.51	279.23	6.15	-170	-10	-45	-15
PE-34:3 (18:3/16:0)	712.49	277.22	6.15	-170	-10	-45	-15
PE-35:1-d5 (17:0/18:1)	735.6	281.4	6.15	-170	-10	-44	-17
PE-36:1 (18:1/18:0)	744.55	281.25	6.15	-170	-10	-45	-15
PE-36:1 (20:1/16:0)	744.55	309.28	6.15	-170	-10	-45	-15
PE-36:2 (16:0/20:2)	742.54	255.23	6.15	-170	-10	-45	-15
PE-36:2 (18:1/18:1)	742.54	281.25	6.15	-170	-10	-45	-15
PE-36:2 (18:2/18:0)	742.54	279.23	6.15	-170	-10	-45	-15
PE-36:3 (18:2/18:1)	740.52	279.23	6.15	-170	-10	-45	-15
PE-36:3 (18:3/18:0)	740.52	277.22	6.15	-170	-10	-45	-15
PE-36:4 (18:1/18:3)	738.51	281.25	6.15	-170	-10	-45	-15
PE-36:4 (18:2/18:2)	738.51	279.23	6.15	-170	-10	-45	-15
PE-36:5 (18:2/18:3)	736.49	279.23	6.15	-170	-10	-45	-15
PE-36:6 (18:3/18:3)	734.48	277.22	6.15	-170	-10	-45	-15
PE-37:3-d5 (17:0/20:3)	759.6	305.2	6.2	-170	-10	-38	-13
PE-38:1 (20:1/18:0)	772.59	309.28	6.15	-170	-10	-45	-15
PE-38:1 (22:1/16:0)	772.59	337.31	6.15	-170	-10	-45	-15
PE-38:2 (18:0/20:2)	770.57	283.26	6.15	-170	-10	-45	-15
PE-38:2 (18:1/20:1)	770.57	281.25	6.15	-170	-10	-45	-15
PE-38:3 (18:1/20:2)	768.55	281.25	6.15	-170	-10	-45	-15
PE-38:3 (18:2/20:1)	768.55	279.23	6.15	-170	-10	-45	-15
PE-38:4 (18:2/20:2)	766.54	279.23	6.15	-170	-10	-45	-15
PE-38:4 (20:1/18:3)	766.54	309.28	6.15	-170	-10	-45	-15
PE-39:4-d5 (17:0/22:4)	785.6	331.2	6.2	-170	-10	-38	-13
PE-40:1 (22:1/18:0)	800.62	337.31	6.15	-170	-10	-45	-15
PE-40:1 (24:1/16:0)	800.62	365.34	6.15	-170	-10	-45	-15
PE-40:2 (20:1/20:1)	798.6	309.28	6.15	-170	-10	-45	-15
PE-40:2 (22:1/18:1)	798.6	337.31	6.15	-170	-10	-45	-15
PE-40:3 (20:1/20:2)	796.59	309.28	6.15	-170	-10	-45	-15
PE-40:3 (22:1/18:2)	796.59	337.31	6.15	-170	-10	-45	-15
PE-40:4 (20:2/20:2)	794.57	307.26	6.15	-170	-10	-45	-15
PE-40:4 (22:1/18:3)	794.57	337.31	6.15	-170	-10	-45	-15
PG-31:1-d5 (17:0/14:1)	710.6	225.2	8.3	-100	-10	-44	-13
PG-33:1-d5 (17:0/16:1)	738.4	253.2	8.3	-100	-10	-44	-13
PG-34:1 (18:1/16:0)	747.52	281.25	8.3	-100	-10	-52	-15
PG-34:2 (18:2/16:0)	745.5	279.23	8.3	-100	-10	-52	-15
PG-34:3 (18:3/16:0)	743.49	277.22	8.3	-100	-10	-52	-15
PG-35:1-d5 (17:0/18:1)	766.5	281.3	8.3	-100	-10	-48	-17
PG-36:1 (18:1/18:0)	775.55	281.25	8.3	-100	-10	-52	-15
PG-36:1 (20:1/16:0)	775.55	309.28	8.3	-100	-10	-52	-15
PG-36:2 (16:0/20:2)	773.53	255.23	8.3	-100	-10	-52	-15
PG-36:2 (18:1/18:1)	773.53	281.25	8.3	-100	-10	-52	-15
PG-36:2 (18:2/18:0)	773.53	279.23	8.3	-100	-10	-52	-15
PG-36:3 (18:2/18:1)	771.52	279.23	8.3	-100	-10	-52	-15
PG-36:3 (18:3/18:0)	771.52	277.22	8.3	-100	-10	-52	-15
PG-36:4 (18:1/18:3)	769.5	281.25	8.3	-100	-10	-52	-15
PG-36:4 (18:2/18:2)	769.5	279.23	8.3	-100	-10	-52	-15
PG-36:5 (18:2/18:3)	767.49	279.23	8.3	-100	-10	-52	-15
PG-36:6 (18:3/18:3)	765.47	277.22	8.3	-100	-10	-52	-15
PG-37:3-d5 (17:0/20:3)	790.4	305.2	8.3	-100	-10	-44	-13
PG-38:1 (20:1/18:0)	803.58	309.28	8.3	-100	-10	-52	-15
PG-38:1 (22:1/16:0)	803.58	337.31	8.3	-100	-10	-52	-15
PG-38:2 (18:0/20:2)	801.56	283.26	8.3	-100	-10	-52	-15
PG-38:2 (18:1/20:1)	801.56	281.25	8.3	-100	-10	-52	-15
PG-38:3 (18:1/20:2)	799.55	281.25	8.3	-100	-10	-52	-15
PG-38:3 (18:2/20:1)	799.55	279.23	8.3	-100	-10	-52	-15
PG-38:4 (18:2/20:2)	797.53	279.23	8.3	-100	-10	-52	-15
PG-38:4 (20:1/18:3)	797.53	309.28	8.3	-100	-10	-52	-15
PG-39:4-d5 (17:0/22:4)	816.4	331.2	8.3	-100	-10	-44	-13
PG-40:1 (22:1/18:0)	831.61	337.31	8.3	-100	-10	-52	-15
PG-40:1 (24:1/16:0)	831.61	365.34	8.3	-100	-10	-52	-15
PG-40:2 (20:1/20:1)	829.6	309.28	8.3	-100	-10	-52	-15
PG-40:2 (22:1/18:1)	829.6	337.31	8.3	-100	-10	-52	-15
PG-40:3 (20:1/20:2)	827.58	309.28	8.3	-100	-10	-52	-15
PG-40:3 (22:1/18:2)	827.58	337.31	8.3	-100	-10	-52	-15
PG-40:4 (20:2/20:2)	825.56	307.26	8.3	-100	-10	-52	-15
PG-40:4 (22:1/18:3)	825.56	337.31	8.3	-100	-10	-52	-15
PI-31:1-d5 (17:0/14:1)	798.6	269.2	8.8	-120	-10	-60	-15
PI-33:1-d5 (17:0/16:1)	826.6	253.2	8.8	-120	-10	-60	-15
PI-34:1 (18:1/16:0)	835.53	281.25	8.8	-120	-10	-65	-15
PI-34:2 (18:2/16:0)	833.52	279.23	8.8	-120	-10	-65	-15
PI-34:3 (18:3/16:0)	831.5	277.22	8.8	-120	-10	-65	-15
PI-35:1-d5 (17:0/18:1)	854.6	281.2	8.8	-120	-10	-62	-15
PI-36:1 (18:1/18:0)	863.56	281.25	8.8	-120	-10	-65	-15
PI-36:1 (20:1/16:0)	863.56	309.28	8.8	-120	-10	-65	-15
PI-36:2 (16:0/20:2)	861.55	255.23	8.8	-120	-10	-65	-15
PI-36:2 (18:1/18:1)	861.55	281.25	8.8	-120	-10	-65	-15
PI-36:2 (18:2/18:0)	861.55	279.23	8.8	-120	-10	-65	-15
PI-36:3 (18:2/18:1)	859.53	279.23	8.8	-120	-10	-65	-15
PI-36:3 (18:3/18:0)	859.53	277.22	8.8	-120	-10	-65	-15
PI-36:4 (18:1/18:3)	857.52	281.25	8.8	-120	-10	-65	-15
PI-36:4 (18:2/18:2)	857.52	279.23	8.8	-120	-10	-65	-15
PI-36:5 (18:2/18:3)	855.5	279.23	8.8	-120	-10	-65	-15
PI-36:6 (18:3/18:3)	853.49	277.22	8.8	-120	-10	-65	-15
PI-37:3-d5 (17:0/20:3)	878.6	305.2	8.8	-120	-10	-60	-15
PI-38:1 (20:1/18:0)	891.6	309.28	8.8	-120	-10	-65	-15
PI-38:1 (22:1/16:0)	891.6	337.31	8.8	-120	-10	-65	-15
PI-38:2 (18:0/20:2)	889.58	283.26	8.8	-120	-10	-65	-15
PI-38:2 (18:1/20:1)	889.58	281.25	8.8	-120	-10	-65	-15
PI-38:3 (18:1/20:2)	887.56	281.25	8.8	-120	-10	-65	-15
PI-38:3 (18:2/20:1)	887.56	279.23	8.8	-120	-10	-65	-15
PI-38:4 (18:2/20:2)	885.55	279.23	8.8	-120	-10	-65	-15
PI-38:4 (20:1/18:3)	885.55	309.28	8.8	-120	-10	-65	-15
PI-39:4-d5 (17:0/22:4)	904.6	331.2	8.8	-120	-10	-60	-15
PI-40:1 (22:1/18:0)	919.63	337.31	8.8	-120	-10	-65	-15
PI-40:1 (24:1/16:0)	919.63	365.34	8.8	-120	-10	-65	-15
PI-40:2 (20:1/20:1)	917.61	309.28	8.8	-120	-10	-65	-15
PI-40:2 (22:1/18:1)	917.61	337.31	8.8	-120	-10	-65	-15
PI-40:3 (20:1/20:2)	915.6	309.28	8.8	-120	-10	-65	-15
PI-40:3 (22:1/18:2)	915.6	337.31	8.8	-120	-10	-65	-15
PI-40:4 (20:2/20:2)	913.58	307.26	8.8	-120	-10	-65	-15
PI-40:4 (22:1/18:3)	913.58	337.31	8.8	-120	-10	-65	-15
PS-31:1-d5 (17:0/14:1)	723.6	269.3	9.7	-100	-10	-52	-15
PS-33:1-d5 (17:0/16:1)	751.6	253.2	9.7	-100	-10	-50	-13
PS-34:1 (18:1/16:0)	760.51	281.25	9.7	-100	-10	-56	-15
PS-34:2 (18:2/16:0)	758.5	279.23	9.7	-100	-10	-56	-15
PS-34:3 (18:3/16:0)	756.48	277.22	9.7	-100	-10	-56	-15
PS-35:1-d5 (17:0/18:1)	779.6	269.3	9.7	-100	-10	-54	-15
PS-36:1 (18:1/18:0)	788.54	281.25	9.7	-100	-10	-56	-15
PS-36:1 (20:1/16:0)	788.54	309.28	9.7	-100	-10	-56	-15
PS-36:2 (16:0/20:2)	786.53	255.23	9.7	-100	-10	-56	-15
PS-36:2 (18:1/18:1)	786.53	281.25	9.7	-100	-10	-56	-15
PS-36:2 (18:2/18:0)	786.53	279.23	9.7	-100	-10	-56	-15
PS-36:3 (18:2/18:1)	784.51	279.23	9.7	-100	-10	-56	-15
PS-36:3 (18:3/18:0)	784.51	277.22	9.7	-100	-10	-56	-15
PS-36:4 (18:1/18:3)	782.5	281.25	9.7	-100	-10	-56	-15
PS-36:4 (18:2/18:2)	782.5	279.23	9.7	-100	-10	-56	-15
PS-36:5 (18:2/18:3)	780.48	279.23	9.7	-100	-10	-56	-15
PS-36:6 (18:3/18:3)	778.47	277.22	9.7	-100	-10	-56	-15
PS-37:3-d5 (17:0/20:3)	803.6	305.2	9.7	-100	-10	-56	-15
PS-38:1 (20:1/18:0)	816.58	309.28	9.7	-100	-10	-56	-15
PS-38:1 (22:1/16:0)	816.58	337.31	9.7	-100	-10	-56	-15
PS-38:2 (18:0/20:2)	814.56	283.26	9.7	-100	-10	-56	-15
PS-38:2 (18:1/20:1)	814.56	281.25	9.7	-100	-10	-56	-15
PS-38:3 (18:1/20:2)	812.54	281.25	9.7	-100	-10	-56	-15
PS-38:3 (18:2/20:1)	812.54	279.23	9.7	-100	-10	-56	-15
PS-38:4 (18:2/20:2)	810.53	279.23	9.7	-100	-10	-56	-15
PS-38:4 (20:1/18:3)	810.53	309.28	9.7	-100	-10	-56	-15
PS-39:4-d5 (17:0/22:4)	829.6	331.2	9.7	-100	-10	-50	-13
PS-40:1 (22:1/18:0)	844.61	337.31	9.7	-100	-10	-56	-15
PS-40:1 (24:1/16:0)	844.61	365.34	9.7	-100	-10	-56	-15
PS-40:2 (20:1/20:1)	842.59	309.28	9.7	-100	-10	-56	-15
PS-40:2 (22:1/18:1)	842.59	337.31	9.7	-100	-10	-56	-15
PS-40:3 (20:1/20:2)	840.58	309.28	9.7	-100	-10	-56	-15
PS-40:3 (22:1/18:2)	840.58	337.31	9.7	-100	-10	-56	-15
PS-40:4 (20:2/20:2)	838.56	307.26	9.7	-100	-10	-56	-15
PS-40:4 (22:1/18:3)	838.56	337.31	9.7	-100	-10	-56	-15
SQDG-34:0 (18:0/16:0)	793.51	283.26	7.5	-160	-10	-60	-15
SQDG-34:1 (18:0/16:1)	791.5	283.26	7.5	-160	-10	-60	-15
SQDG-34:1 (18:1/16:0)	791.5	281.25	7.5	-160	-10	-60	-15
SQDG-34:2 (18:0/16:2)	789.48	283.26	7.5	-160	-10	-60	-15
SQDG-34:2 (18:1/16:1)	789.48	281.25	7.5	-160	-10	-60	-15
SQDG-34:2 (18:2/16:0)	789.48	279.23	7.5	-160	-10	-60	-15
SQDG-34:3 (18:0/16:3)	787.47	283.26	7.5	-160	-10	-60	-15
SQDG-34:3 (18:1/16:2)	787.47	281.25	7.5	-160	-10	-60	-15
SQDG-34:3 (18:2/16:1)	787.47	279.23	7.5	-160	-10	-60	-15
SQDG-34:3 (18:3/16:0)	787.47	277.22	7.5	-160	-10	-60	-15
SQDG-34:4 (18:1/16:3)	785.45	281.25	7.5	-160	-10	-60	-15
SQDG-34:4 (18:2/16:2)	785.45	279.23	7.5	-160	-10	-60	-15
SQDG-34:4 (18:3/16:1)	785.45	277.22	7.5	-160	-10	-60	-15
SQDG-34:5 (18:2/16:3)	783.44	279.23	7.5	-160	-10	-60	-15
SQDG-34:5 (18:3/16:2)	783.44	277.22	7.5	-160	-10	-60	-15
SQDG-34:6 (18:3/16:3)	781.42	277.22	7.5	-160	-10	-60	-15
SQDG-36:0 (18:0/18:0)	821.54	283.26	7.5	-160	-10	-60	-15
SQDG-36:1 (18:1/18:0)	819.53	281.25	7.5	-160	-10	-60	-15
SQDG-36:2 (18:1/18:1)	817.51	281.25	7.5	-160	-10	-60	-15
SQDG-36:2 (18:2/18:0)	817.51	279.23	7.5	-160	-10	-60	-15
SQDG-36:3 (18:1/18:2)	815.5	281.25	7.5	-160	-10	-60	-15
SQDG-36:4 (18:1/18:3)	813.48	281.25	7.5	-160	-10	-60	-15
SQDG-36:4 (18:2/18:2)	813.48	279.23	7.5	-160	-10	-60	-15
SQDG-36:5 (18:2/18:3)	811.47	279.23	7.5	-160	-10	-60	-15
SQDG-36:6 (18:3/18:3)	809.45	277.22	7.5	-160	-10	-60	-15

## Sheet: Supp Table 4 - Extraction metho
Supplementary Table 4. Comparison of different extraction methods.
Values represent the average sum of HPLC peak area for each lipid class, normalized by tissue weight. (n = 4, ± S.D.) Polar lipids are highlighted in bold.
Seed
Lipid class	Method 1 (Hex/IPA)	Method 2 (IPA/CHCl3 – #1)	Method 3 (IPA/CHCl3 – #2)	Method 4 (BuMe)	Method 5 (MTBE)
DG	6.4E5 ± 3.4E4	6.4E5 ± 5.5E4	6.5E5 ± 5.6E4	6.6E5 ± 1.4E5	5.9E5 ± 1.2E5
TG	4.7E8 ± 1.1E8	4.9E8 ± 5.6E7	5.5E8 ± 5.4E7	5.8E8 ± 1.9E8	6.1E8 ± 1.0E8
PC	2.7E6 ± 5.1E5	3.6E6 ± 4.1E5	4.2E6 ± 2.5E5	4.5E6 ± 2.3E5	5.3E6 ± 3.9E5
PE	9.3E6 ± 1.1E6	8.8E6 ± 2.7E5	8.6E6 ± 4.3E5	8.8E6 ± 4.8E5	9.4E6 ± 2.8E5
PI	8.2E5 ± 3.5E5	3.3E6 ± 2.0E5	3.2E6 ± 3.2E5	2.1E6 ± 5.9E4	2.7E6 ± 1.1E5
PG	1.9E6 ± 3.9E5	2.5E6 ± 3.1E5	2.3E6 ± 1.3E5	1.9E6 ± 1.1E5	2.2E6 ± 2.0E5
PS	1.9E4 ± 6.2E3	7.0E4 ± 2.2E3	6.8E4 ± 5.2E3	6.8E4 ± 3.0E3	8.2E4 ± 5.2E3
LPC	5.3E4 ± 1.8E4	7.3E4 ± 3.8E3	7.9E4 ± 5.2E3	6.7E4 ± 3.6E3	6.2E4 ± 3.8E3
LPE	1.0E5 ± 2.8E4	8.8E4 ± 1.0E4	9.4E4 ± 8.9E3	7.7E4 ± 3.5E3	8.0E4 ± 9.5E3
LPI	3.8E4 ± 1.8E4	5.3E4 ± 7.0E3	5.6E4 ± 4.7E3	4.9E4 ± 8.9E3	5.1E4 ± 7.4E3
LPG	7.1E4 ± 5.1E4	7.4E4 ± 2.7E3	6.1E4 ± 4.3E3	5.7E4 ± 7.1E3	5.0E4 ± 3.6E3
MGDG	8.8E3 ± 3.0E3	1.9E4 ± 2.2E3	2.7E4 ± 3.8E3	3.5E4 ± 1.2E4	3.2E4 ± 1.2E4
DGDG	2.5E4 ± 7.5E3	5.1E4 ± 7.0E3	5.4E4 ± 4.0E3	6.1E4 ± 5.0E3	6.4E4 ± 8.6E3
SQDG	5.0E3 ± 1.2E3	9.4E3 ± 1.2E3	1.2E4 ± 2.7E3	8.3E3 ± 7.3E2	7.9E3 ± 1.3E3
Leaf
PC	1.6E6 ± 3.8E5	2.2E6 ± 1.8E5	2.2E6 ± 1.5E5	2.4E6 ± 7.9E4	2.7E6 ± 2.6E5
PE	6.9E6 ± 7.6E5	8.2E6 ± 5.6E5	7.4E6 ± 4.2E5	8.3E6 ± 5.7E5	8.8E6 ± 4.9E5
PI	3.9E5 ± 9.3E4	1.4E6 ± 1.2E5	1.2E6 ± 9.4E4	8.3E5 ± 7.0E4	1.3E6 ± 6.0E4
PG	2.4E6 ± 2.8E5	3.3E6 ± 1.4E5	3.3E6 ± 3.0E5	3.0E6 ± 2.3E5	3.1E6 ± 1.3E5
PS	1.5E4 ± 2.2E3	2.5E4 ± 3.8E3	2.4E4 ± 1.6E3	2.7E4 ± 4.3E3	2.9E4 ± 3.3E3
LPC	3.2E4 ± 7.7E3	4.6E4 ± 6.7E3	3.8E4 ± 4.7E3	3.9E4 ± 4.5E3	3.8E4 ± 4.0E3
LPE	9.1E4 ± 2.7E4	1.2E5 ± 7.3E3	9.3E4 ± 6.2E3	9.4E4 ± 2.6E3	8.9E4 ± 6.5E3
LPI	3.6E4 ± 1.1E4	4.4E4 ± 4.6E3	4.5E4 ± 5.3E3	3.9E4 ± 3.9E3	4.0E4 ± 3.2E3
LPG	1.8E5 ± 7.2E4	1.9E5 ± 1.5E4	1.6E5 ± 2.1E4	1.2E5 ± 1.2E4	1.4E5 ± 2.0E4
MGDG	3.4E6 ± 1.7E6	5.5E6 ± 1.9E6	5.4E6 ± 2.5E6	5.7E6 ± 1.9E6	8.0E6 ± 2.0E6
DGDG	3.5E6 ± 1.7E5	5.2E6 ± 2.4E5	6.5E6 ± 1.0E6	7.4E6 ± 7.0E5	8.0E6 ± 7.2E5
SQDG	7.1E5 ± 1.0E5	7.4E5 ± 2.8E4	7.9E5 ± 6.5E4	8.2E5 ± 4.4E4	8.4E5 ± 1.2E5
